# Supplementary material
Source: PubMed Central journal article supplement (PMC3690867)
Supplement: 1220333110_pnas.201220333SI.pdf [file 1220333110_pnas.201220333SI.pdf]

# Supporting Information

Pasari et al. 10.1073/pnas.1220333110

## SI Methods

**Cedar Creek Experimental Design.** We used 1997, 1998, 1999, 2002, and 2006 data from the Cedar Creek biodiversity experiment in which 168 9 m × 9 m field plots were planted with randomized combinations of 1, 2, 4, 8, and 16 perennial grassland species (1). We included data on eight ecosystem functions: invasion resistance (100% minus percent cover of invasive species), above-ground net primary productivity, belowground biomass (root biomass) (0–30 cm), nitrogen retention in soil (minimizing NO<sub>2</sub> and NO<sub>3</sub><sup>-</sup>, 0–20 cm), insect species richness and abundance (in August), change in soil C since 1994 (0–20 cm), and plant N (% total N in above-ground biomass). Soil C data were only collected in 2006, while insect richness and abundance data were not collected in 2006. We did not analyze results from 2000, 2001, 2003–2005, or 2007–2010 because data on all functions were not collected in those years. Insect richness and abundance are indices of habitat quality, an important ecosystem function measured previously in this site and others (2–7). While a few other functions were measured in the original experiment, only these eight functions were chosen because they were measured in multiple years (whereas the others were not) and because they have been measured in other large-scale ecosystem function studies (8–10), making our results more easily comparable to other studies.

**Diversity Measures.** We created 50,000 unique experimental landscapes, each composed of 24 experimental plots. Within each experimental landscape,  $\gamma$  diversity was calculated as the number of unique species, and  $\bar{\alpha}$  diversity as the average  $\alpha$  of all 24 experimental communities. Several  $\beta$  diversity metrics are appropriate for expressing nondirectional variation in species composition among all communities in a landscape using presence/absence data (11, 12). We chose the one complement of Sørensen's Index as a sensitive measure of  $\beta$  diversity that scales from 0 (all species in common, low  $\beta$  diversity) to 1 (no species in common, high  $\beta$  diversity). We also calculated a coarser measure of  $\beta$  diversity as the number of experimental communities in an experimental landscape that do not share exactly the same species composition, which scales from 1 (identical communities, low  $\beta$  diversity) to 24 (all different communities, high  $\beta$  diversity). Since results from both are similar, we report the coarser measure in the text because we find it easier to interpret.

**Landscape Generation.** Given the low degree of replication of species composition in the original experiment, and to generate a distribution of experimental landscapes with a full range of  $\beta$  diversity values, we assembled experimental landscapes with a progressively increasing chance of having identical experimental communities drawn to create them. Since there is no spatial component to these experimental landscapes, plots were selected independently of their spatial location in the original biodiversity experiment.

To ensure an even  $\beta$  distribution, we binned these 50,000 experimental landscapes by their  $\beta$  diversity values (from 1 to 24 binned by 1, and from 0.1 to 1 binned by 0.1 for  $\beta = 1 - \text{Sørensen's Index}$ ) and randomly selected the same number of experimental landscapes from each bin (equal to the number of experimental landscapes in the smallest bin) to create a distribution with perfectly even  $\beta$  diversity. We chose a landscape size of 24 experimental communities because smaller experimental landscapes did not permit full and evenly distributed ranges of  $\bar{\alpha}$ ,  $\beta$ , and  $\gamma$  diversity values, and larger experimental landscapes did

not extend the ranges or further even the distributions. After subsampling from the original pool of 50,000 experimental landscapes as described above to create a pool with more even diversity distributions, we were left with 7,512 experimental landscapes (6,489 experimental landscapes when  $\beta = 1 - \text{Sørensen's Index}$ ).

**Analysis.** We assessed the ability of experimental landscapes to simultaneously achieve at least a particular quantile (multifunctionality threshold, or T) of each function across all experimental landscapes and functions (2). Results using percent-of-maximum-based thresholds were qualitatively similar and are shown below. For each year and threshold of the 20th, 30th, 40th, 50th, 60th, and 70th quantiles, we calculated the number of functions above T achieved by each experimental landscape. We also calculated the mean number of functions that each experimental landscape achieved at each threshold across all years.

In addition to a threshold-based approach, we also calculated a unique multifunctionality metric (MF) as the mean of all functions minus its SD in each experimental landscape, where each function is scaled to the maximum observed among all experimental landscapes (where 0 is the minimum and 1 is the maximum observed), and individual functions at the landscape scale are the sums of each function among its 24 component experimental communities. Thus, once they are standardized, calculations of individual functions are simply a reduced form of MF, since individual functions do not have among-function variance. MF takes highest values for landscapes that are high performing across functions. We calculated standardized individual function values and MF for all experimental landscapes in each year, and also averaged for each experimental landscape across years. Functions were assigned positive or negative values if responses to diversity treatments were positive or negative (respectively) from an ecosystem services perspective (8).

We used ordinary least squares regression to determine how the independent variables of  $\bar{\alpha}$ ,  $\beta$ , and  $\gamma$  diversity influenced the dependent variables of each individual function, the number of functions achieved above thresholds, and MF. To compare the strength of effects and explanatory power of each independent variable, we also calculated standardized regression weights and partial coefficients of determination (partial  $r^2$ ) for each diversity metric in multivariate models of each dependent variable. We also performed an analysis of residual variance on the three bivariate regressions between MF and  $\bar{\alpha}$ ,  $\beta$ , and  $\gamma$  diversity to examine changes in MF variance as a function of diversity.

Standard transformations of independent variables did not improve regression diagnostics or significantly improve model fit. Multicollinearity tolerance always exceeded 0.2, and slope parameter estimates of each independent variable changed less than 2% during both stepwise forward parameter additions and backward deletions, indicating that multicollinearity did not bias interpretations (13, 14). All three biodiversity metrics are included in all regressions reported and displayed in the main text, and are the best models as chosen by Akaike Information Criterion (AIC). All three diversity metrics are also included in either the best model or are within  $\Delta\text{AIC} \leq 1$  of the best model of the other regressions reported below, with a few exceptions indicated in Tables S1 and S2. We tested for experimental landscape independence and correlation structure by regressing model residuals against each diversity metric. No correlation structure was detected for any regression and  $P$  values approached 1. Including diversity interaction terms in multiple

regressions on multifunctionality increased overall model  $R^2$ s by less than 10% relative to regressions with no interaction terms. Given the difficulties of interpreting interactions between con-

tinuous variables (15) and their limited explanatory power in this case, we do not report them. We performed all analyses using the R software package (16).

1. Tilman D, Reich PB, Knops JMH (2006) Biodiversity and ecosystem stability in a decade-long grassland experiment. *Nature* 441(7093):629–632.
2. Zavaleta ES, Pasari JR, Hulvey KB, Tilman GD (2010) Sustaining multiple ecosystem functions in grassland communities requires higher biodiversity. *Proc Natl Acad Sci USA* 107(4):1443–1446.
3. Cardinale BJ, Harvey CT, Gross K, Ives AR (2003) Biodiversity and biocontrol: emergent impacts of a multi-enemy assemblage on pest suppression and crop yield in an agroecosystem. *Ecol Lett* 6(9):857–865.
4. Hartley SE, Jones TH (2003) Plant diversity and insect herbivores: Effects of environmental change in contrasting model systems. *Oikos* 101(1):6–17.
5. Knops JMH, et al. (1999) Effects of plant species richness on invasion dynamics, disease outbreaks, insect abundances and diversity. *Ecol Lett* 2(5):286–293.
6. Haddad NM, Tilman D, Haarstad J, Ritchie M, Knops JM (2001) Contrasting effects of plant richness and composition on insect communities: A field experiment. *Am Nat* 158(1):17–35.
7. Haddad NM, Crutsinger GM, Gross K, Haarstad J, Tilman D (2011) Plant diversity and the stability of foodwebs. *Ecol Lett* 14(1):42–46.
8. Hector A, Bagchi R (2007) Biodiversity and ecosystem multifunctionality. *Nature* 448(7150):188–190.
9. Isbell F, et al. (2011) High plant diversity is needed to maintain ecosystem services. *Nature* 477(7363):199–202.
10. Roscher C, et al. (2004) The role of biodiversity for element cycling and trophic interactions: An experimental approach in a grassland community. *Basic Appl Ecol* 5(2):107–121.
11. Anderson MJ, et al. (2011) Navigating the multiple meanings of  $\beta$  diversity: A roadmap for the practicing ecologist. *Ecol Lett* 14(1):19–28.
12. Tuomisto H (2010) A diversity of beta diversities: Straightening up a concept gone awry. Part 1. Defining beta diversity as a function of alpha and gamma diversity. *Ecography* 33(1):2–22.
13. Zar JH (2004) *Biostatistical Analysis* (Pearson, Upper Saddle River, NJ).
14. Belsley DA, Kuh E, Welsch RE (1980) *Regression Diagnostics: Identifying Influential Data and Sources of Collinearity* (Wiley, New York).
15. Aiken LS, West SG, Reno RR (1991) *Multiple Regression: Testing and Interpreting Interactions* (Sage, Newbury Park, CA).
16. R Development Core Team (2011) *R: A Language and Environment for Statistical Computing* (R Foundation for Statistical Computing, Vienna, Austria).

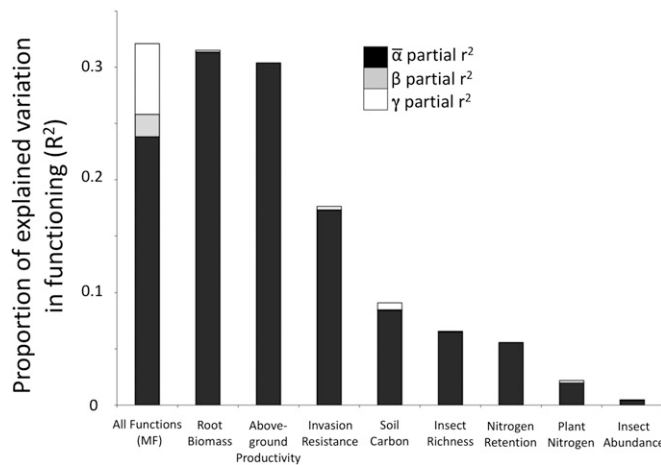

**Fig. S1.** Biodiversity coefficients of determination. Partial coefficients of determination for  $\alpha$ ,  $\beta$  and  $\gamma$  diversities in nine multiple regressions explaining cross-year averages of multifunctionality and each single function (soil carbon data from 2006 only). The  $r^2$ s reflect the proportion of variance explained by each scale of diversity in each regression ( $P < 0.001$  for all coefficients) and sum to the total variance explained ( $R^2$ ).  $\beta$  diversity is calculated as the number of experimental communities in an experimental landscape that do not share exactly the same species composition. Results with  $\beta$  calculated as  $1 - \text{Sorensen's Index}$  are qualitatively similar.

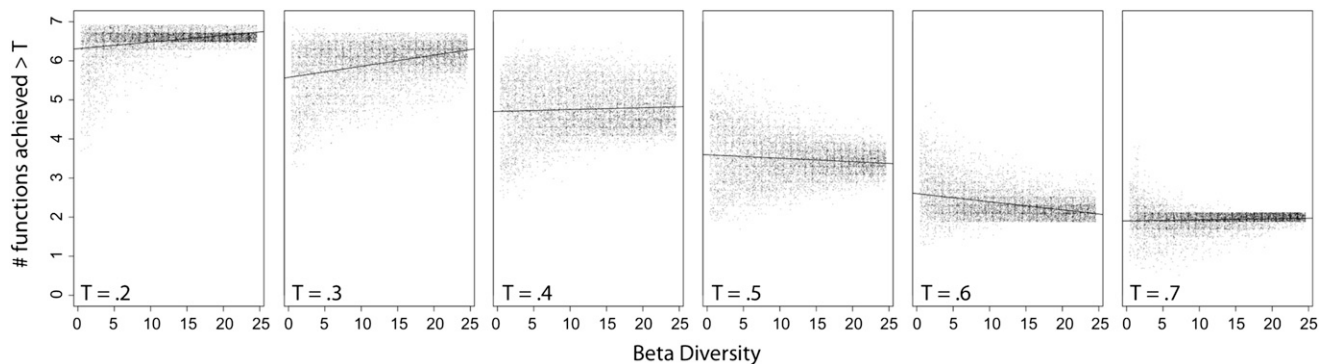

**Fig. S2.** Effect of  $\beta$  diversity on the average number of functions achieved by each experimental landscape above thresholds ( $T$ ) across all years, where  $T$  is the percent-of-maximum observed functioning of each function across all experimental landscapes.  $\beta$  diversity is calculated as the number of experimental communities in an experimental landscape that do not share exactly the same species composition.  $n = 7,512$  experimental landscapes.  $P < 0.001$  for all.

**Table S1. Standardized regression coefficients for the effects of  $\alpha$ ,  $\beta$ , and  $\gamma$  diversity on single and multiple functions**

| Threshold                                | Year | Function                  | $\alpha$ | $\beta$ | $\gamma$ | R <sup>2</sup> |
|------------------------------------------|------|---------------------------|----------|---------|----------|----------------|
| multifunctionality (not threshold-based) | All  | All                       | 0.46     | 0.11    | 0.16     | 0.32           |
| multifunctionality (not threshold-based) | 1997 | All                       | 0.12     | 0.08    | 0.17     | 0.08           |
| multifunctionality (not threshold-based) | 1998 | All                       | 0.29     | 0.08    | 0.11     | 0.14           |
| multifunctionality (not threshold-based) | 1999 | All                       | 0.36     | 0.11    | 0.14     | 0.22           |
| multifunctionality (not threshold-based) | 2002 | All                       | 0.43     | 0.12    | 0.15     | 0.30           |
| multifunctionality (not threshold-based) | 2006 | All                       | 0.57     | 0.06    | 0.10     | 0.39           |
| 20                                       | All  | All                       | 0.36     | 0.53    | 0.16     | 0.57           |
| 20                                       | 1997 | All                       | 0.21     | 0.42    | 0.14     | 0.33           |
| 20                                       | 1998 | All                       | 0.34     | 0.44    | 0.12     | 0.41           |
| 20                                       | 1999 | All                       | 0.26     | 0.44    | 0.13     | 0.37           |
| 20                                       | 2002 | All                       | 0.30     | 0.44    | 0.14     | 0.41           |
| 20                                       | 2006 | All                       | 0.41     | 0.44    | 0.10     | 0.45           |
| 30                                       | All  | All                       | 0.49     | 0.52    | -0.02    | 0.49           |
| 30                                       | 1997 | All                       | 0.27     | 0.39    | 0.01*    | 0.23           |
| 30                                       | 1998 | All                       | 0.41     | 0.41    | -0.03    | 0.31           |
| 30                                       | 1999 | All                       | 0.35     | 0.43    | -0.01*   | 0.30           |
| 30                                       | 2002 | All                       | 0.40     | 0.43    | -0.01    | 0.33           |
| 30                                       | 2006 | All                       | 0.51     | 0.40    | -0.04    | 0.38           |
| 40                                       | All  | All                       | 0.58     | 0.35    | -0.10    | 0.38           |
| 40                                       | 1997 | All                       | 0.31     | 0.25    | -0.04    | 0.14           |
| 40                                       | 1998 | All                       | 0.43     | 0.27    | -0.08    | 0.21           |
| 40                                       | 1999 | All                       | 0.40     | 0.29    | -0.07    | 0.20           |
| 40                                       | 2002 | All                       | 0.46     | 0.28    | -0.08    | 0.24           |
| 40                                       | 2006 | All                       | 0.59     | 0.23    | -0.12    | 0.32           |
| 50                                       | All  | All                       | 0.61     | 0.08    | -0.14    | 0.31           |
| 50                                       | 1997 | All                       | 0.32     | 0.06    | -0.07    | 0.09           |
| 50                                       | 1998 | All                       | 0.42     | 0.07    | -0.10    | 0.15           |
| 50                                       | 1999 | All                       | 0.42     | 0.09    | -0.10    | 0.15           |
| 50                                       | 2002 | All                       | 0.48     | 0.05    | -0.11    | 0.19           |
| 50                                       | 2006 | All                       | 0.61     | 0.02    | -0.15    | 0.32           |
| 60                                       | All  | All                       | 0.56     | -0.22   | -0.14    | 0.35           |
| 60                                       | 1997 | All                       | 0.30     | -0.16   | -0.07    | 0.12           |
| 60                                       | 1998 | All                       | 0.40     | -0.15   | -0.10    | 0.18           |
| 60                                       | 1999 | All                       | 0.40     | -0.15   | -0.09    | 0.18           |
| 60                                       | 2002 | All                       | 0.44     | -0.18   | -0.11    | 0.22           |
| 60                                       | 2006 | All                       | 0.57     | -0.20   | -0.15    | 0.35           |
| 70                                       | All  | All                       | 0.47     | -0.45   | -0.13    | 0.46           |
| 70                                       | 1997 | All                       | 0.26     | -0.35   | -0.07    | 0.21           |
| 70                                       | 1998 | All                       | 0.33     | -0.34   | -0.09    | 0.24           |
| 70                                       | 1999 | All                       | 0.36     | -0.33   | -0.11    | 0.26           |
| 70                                       | 2002 | All                       | 0.38     | -0.37   | -0.11    | 0.31           |
| 70                                       | 2006 | All                       | 0.51     | -0.38   | -0.15    | 0.43           |
| NA                                       | All  | Nitrogen retention        | 0.24     | 0.00    | -0.01    | 0.06           |
| NA                                       | All  | Above-ground productivity | 0.55     | 0.01    | -0.02    | 0.30           |
| NA                                       | All  | Insect abundance          | 0.07     | 0.00    | 0.00     | 0.01           |
| NA                                       | All  | Insect richness           | 0.26     | 0.01    | -0.01    | 0.07           |
| NA                                       | All  | Invasion resistance       | 0.41     | -0.02   | 0.02     | 0.18           |
| NA                                       | All  | Plant nitrogen            | -0.14    | 0.00    | -0.03    | 0.07           |
| NA                                       | All  | Root biomass              | 0.56     | 0.01    | 0.01     | 0.32           |
| NA                                       | 1997 | Nitrogen retention        | 0.26     | 0.00    | -0.02    | 0.06           |
| NA                                       | 1997 | Above-ground productivity | 0.26     | 0.00    | 0.00     | 0.07           |
| NA                                       | 1997 | Insect richness           | 0.29     | 0.01    | -0.03    | 0.00           |
| NA                                       | 1997 | Insect abundance          | 0.01*    | 0.00*   | -0.01*   | 0.08           |
| NA                                       | 1997 | Invasion resistance       | 0.36     | -0.02   | 0.02     | 0.14           |
| NA                                       | 1997 | Plant nitrogen            | -0.25    | 0.00*   | -0.01*   | 0.07           |
| NA                                       | 1997 | Root biomass              | 0.14     | -0.02*  | 0.05     | 0.03           |
| NA                                       | 1998 | Nitrogen retention        | 0.27     | 0.01    | -0.02    | 0.07           |
| NA                                       | 1998 | Above-ground productivity | 0.36     | 0.01    | -0.03    | 0.12           |
| NA                                       | 1998 | Insect abundance          | -0.04    | 0.01    | 0.00     | 0.00           |
| NA                                       | 1998 | Insect richness           | 0.22     | 0.01    | 0.00     | 0.05           |
| NA                                       | 1998 | Invasion resistance       | 0.41     | 0.00    | -0.01    | 0.16           |
| NA                                       | 1998 | Plant nitrogen            | -0.02    | -0.01   | -0.01    | 0.00           |
| NA                                       | 1998 | Root biomass              | 0.38     | 0.00    | 0.00     | 0.14           |

**Table S1. Cont.**

| Threshold | Year | Function                  | $\bar{\alpha}$ | $\beta$ | $\gamma$ | R <sup>2</sup> |
|-----------|------|---------------------------|----------------|---------|----------|----------------|
| NA        | 1999 | Nitrogen retention        | 0.04           | 0.01*   | -0.02    | 0.00           |
| NA        | 1999 | Above-ground productivity | 0.55           | 0.01    | -0.02    | 0.29           |
| NA        | 1999 | Insect abundance          | 0.17           | 0.00*   | 0.01     | 0.03           |
| NA        | 1999 | Insect richness           | 0.05           | 0.01    | 0.00*    | 0.00           |
| NA        | 1999 | Invasion resistance       | 0.39           | -0.01   | 0.02     | 0.16           |
| NA        | 1999 | Plant nitrogen            | -0.16          | 0.01    | -0.03    | 0.03           |
| NA        | 1999 | Root biomass              | 0.44           | 0.02    | 0.00     | 0.19           |
| NA        | 2002 | Nitrogen retention        | -0.06          | -0.03   | 0.01*    | 0.00           |
| NA        | 2002 | Above-ground productivity | 0.59           | 0.01*   | -0.01    | 0.34           |
| NA        | 2002 | Insect abundance          | 0.03           | 0.01    | 0.00*    | 0.00           |
| NA        | 2002 | Insect richness           | 0.24           | 0.01    | 0.00     | 0.06           |
| NA        | 2002 | Invasion resistance       | 0.36           | -0.02   | 0.01     | 0.13           |
| NA        | 2002 | Plant nitrogen            | -0.09          | 0.01    | -0.03    | 0.01           |
| NA        | 2002 | Root biomass              | 0.54           | 0.01    | 0.00     | 0.30           |
| NA        | 2006 | Nitrogen retention        | 0.22           | 0.01    | 0.00*    | 0.05           |
| NA        | 2006 | Above-ground productivity | 0.65           | 0.01*   | -0.01    | 0.42           |
| NA        | 2006 | Invasion resistance       | 0.18           | -0.02   | 0.03     | 0.04           |
| NA        | 2006 | Plant nitrogen            | -0.08          | 0.01    | -0.03    | 0.01           |
| NA        | 2006 | Root biomass              | 0.68           | 0.01    | 0.00*    | 0.45           |
| NA        | 2006 | Soil carbon               | 0.28           | 0.00    | 0.04     | 0.09           |

$\beta$  diversity is calculated as the number of communities in a landscape that do not share exactly the same species composition.  $n = 7,512$  landscapes for each regression. NA indicates not applicable because regressions measure single functions.  $P < 0.05$  for all regressions.

\*Parameter should not be included in best model as selected by AIC.

**Table S2. Standardized regression coefficients for the effects of  $\alpha$ ,  $\beta$ , and  $\gamma$  diversity on single and multiple functions**

| Threshold                                | Year | Function                  | $\alpha$ | $\beta$ | $\gamma$ | R <sup>2</sup> |
|------------------------------------------|------|---------------------------|----------|---------|----------|----------------|
| multifunctionality (not threshold-based) | All  | All                       | 0.59     | 0.18    | 0.05     | 0.34           |
| multifunctionality (not threshold-based) | 1997 | All                       | 0.21     | 0.17    | 0.05     | 0.07           |
| multifunctionality (not threshold-based) | 1998 | All                       | 0.34     | 0.11    | 0.05     | 0.13           |
| multifunctionality (not threshold-based) | 1999 | All                       | 0.47     | 0.16    | 0.06     | 0.23           |
| multifunctionality (not threshold-based) | 2002 | All                       | 0.59     | 0.20    | 0.03     | 0.33           |
| multifunctionality (not threshold-based) | 2006 | All                       | 0.67     | 0.09    | 0.01     | 0.43           |
| 20                                       | All  | All                       | 0.59     | 0.49    | 0.10     | 0.49           |
| 20                                       | 1997 | All                       | 0.34     | 0.39    | 0.09     | 0.25           |
| 20                                       | 1998 | All                       | 0.49     | 0.39    | 0.09     | 0.34           |
| 20                                       | 1999 | All                       | 0.42     | 0.39    | 0.10     | 0.30           |
| 20                                       | 2002 | All                       | 0.54     | 0.44    | 0.06     | 0.38           |
| 20                                       | 2006 | All                       | 0.61     | 0.37    | 0.06     | 0.41           |
| 30                                       | All  | All                       | 0.60     | 0.34    | 0.07     | 0.40           |
| 30                                       | 1997 | All                       | 0.36     | 0.30    | 0.05     | 0.18           |
| 30                                       | 1998 | All                       | 0.46     | 0.25    | 0.08     | 0.25           |
| 30                                       | 1999 | All                       | 0.40     | 0.25    | 0.10     | 0.23           |
| 30                                       | 2002 | All                       | 0.54     | 0.31    | 0.02     | 0.29           |
| 30                                       | 2006 | All                       | 0.64     | 0.25    | 0.00     | 0.36           |
| 40                                       | All  | All                       | 0.62     | 0.14    | 0.02     | 0.36           |
| 40                                       | 1997 | All                       | 0.35     | 0.15    | 0.02     | 0.12           |
| 40                                       | 1998 | All                       | 0.43     | 0.09    | 0.04     | 0.19           |
| 40                                       | 1999 | All                       | 0.42     | 0.11    | 0.06     | 0.19           |
| 40                                       | 2002 | All                       | 0.54     | 0.12    | -0.02    | 0.25           |
| 40                                       | 2006 | All                       | 0.65     | 0.07    | -0.04    | 0.37           |
| 50                                       | All  | All                       | 0.58     | -0.10   | -0.01*   | 0.38           |
| 50                                       | 1997 | All                       | 0.31     | -0.04   | 0.02*    | 0.11           |
| 50                                       | 1998 | All                       | 0.37     | -0.09   | 0.03     | 0.18           |
| 50                                       | 1999 | All                       | 0.40     | -0.08   | 0.03     | 0.20           |
| 50                                       | 2002 | All                       | 0.50     | -0.07   | -0.04    | 0.26           |
| 50                                       | 2006 | All                       | 0.63     | -0.09   | -0.07    | 0.40           |
| 60                                       | All  | All                       | 0.50     | -0.31   | -0.02    | 0.44           |
| 60                                       | 1997 | All                       | 0.23     | -0.23   | 0.03     | 0.15           |
| 60                                       | 1998 | All                       | 0.30     | -0.26   | 0.03     | 0.22           |
| 60                                       | 1999 | All                       | 0.36     | -0.24   | 0.00*    | 0.25           |
| 60                                       | 2002 | All                       | 0.45     | -0.23   | -0.06    | 0.32           |
| 60                                       | 2006 | All                       | 0.58     | -0.22   | -0.08    | 0.46           |
| 70                                       | All  | All                       | 0.40     | -0.47   | -0.03    | 0.52           |
| 70                                       | 1997 | All                       | 0.18     | -0.38   | 0.01     | 0.22           |
| 70                                       | 1998 | All                       | 0.24     | -0.38   | 0.01     | 0.27           |
| 70                                       | 1999 | All                       | 0.30     | -0.39   | 0.00     | 0.32           |
| 70                                       | 2002 | All                       | 0.38     | -0.36   | -0.06    | 0.38           |
| 70                                       | 2006 | All                       | 0.50     | -0.36   | -0.09    | 0.50           |
| NA                                       | All  | Nitrogen retention        | 0.20     | -0.04   | 0.03     | 0.05           |
| NA                                       | All  | Above-ground productivity | 0.52     | -0.05   | 0.03     | 0.31           |
| NA                                       | All  | Insect abundance          | 0.06     | -0.01   | 0.01     | 0.02           |
| NA                                       | All  | Insect richness           | 0.21     | -0.04   | 0.03     | 0.06           |
| NA                                       | All  | Invasion resistance       | 0.44     | -0.04   | 0.02     | 0.22           |
| NA                                       | All  | Plant nitrogen            | -0.13    | 0.04    | -0.04    | 0.02           |
| NA                                       | All  | Root biomass              | 0.54     | -0.05   | 0.05     | 0.32           |
| NA                                       | 1997 | Nitrogen retention        | 0.17     | -0.08   | 0.06     | 0.06           |
| NA                                       | 1997 | Above-ground productivity | 0.19     | -0.07   | 0.06     | 0.07           |
| NA                                       | 1997 | Insect abundance          | -0.03    | 0.00    | 0.00     | 0.00           |
| NA                                       | 1997 | Insect richness           | 0.24     | -0.03   | 0.03     | 0.07           |
| NA                                       | 1997 | Invasion resistance       | 0.39     | -0.03   | 0.02     | 0.17           |
| NA                                       | 1997 | Plant nitrogen            | -0.22    | 0.07    | -0.06    | 0.08           |
| NA                                       | 1997 | Root biomass              | 0.12     | -0.04   | 0.04     | 0.03           |
| NA                                       | 1998 | Nitrogen retention        | 0.23     | -0.05   | 0.04     | 0.07           |
| NA                                       | 1998 | Above-ground productivity | 0.29     | -0.07   | 0.05     | 0.12           |
| NA                                       | 1998 | Insect abundance          | -0.08    | -0.02   | 0.02     | 0.00           |
| NA                                       | 1998 | Insect richness           | 0.18     | -0.03   | 0.04     | 0.04           |
| NA                                       | 1998 | Invasion resistance       | 0.42     | -0.08   | 0.03     | 0.22           |
| NA                                       | 1998 | Plant nitrogen            | 0.00     | 0.04    | -0.03    | 0.00           |
| NA                                       | 1998 | Root biomass              | 0.33     | -0.05   | 0.04     | 0.14           |

**Table S2. Cont.**

| Threshold | Year | Function                  | $\bar{\alpha}$ | $\beta$ | $\gamma$ | R <sup>2</sup> |
|-----------|------|---------------------------|----------------|---------|----------|----------------|
| NA        | 1999 | Nitrogen retention        | 0.00           | -0.04   | 0.04     | 0.00           |
| NA        | 1999 | Above-ground productivity | 0.52           | -0.03   | 0.01     | 0.28           |
| NA        | 1999 | Insect abundance          | 0.18           | 0.00    | 0.02     | 0.04           |
| NA        | 1999 | Insect richness           | 0.01           | -0.04   | 0.04     | 0.00           |
| NA        | 1999 | Invasion resistance       | 0.39           | -0.09   | 0.07     | 0.21           |
| NA        | 1999 | Plant nitrogen            | -0.15          | 0.04    | -0.05    | 0.04           |
| NA        | 1999 | Root biomass              | 0.42           | -0.05   | 0.06     | 0.22           |
| NA        | 2002 | Nitrogen retention        | 0.00           | 0.05    | -0.06    | 0.00           |
| NA        | 2002 | Above-ground productivity | 0.56           | -0.04   | 0.03     | 0.35           |
| NA        | 2002 | Insect abundance          | 0.05           | 0.01    | -0.01    | 0.00           |
| NA        | 2002 | insect richness           | 0.24           | -0.02   | 0.00     | 0.06           |
| NA        | 2002 | Invasion resistance       | 0.39           | -0.03   | 0.00     | 0.16           |
| NA        | 2002 | Plant nitrogen            | -0.13          | 0.00    | 0.00     | 0.02           |
| NA        | 2002 | Root biomass              | 0.53           | -0.06   | 0.05     | 0.34           |
| NA        | 2006 | Nitrogen retention        | 0.25           | 0.00    | 0.00     | 0.06           |
| NA        | 2006 | Above-ground productivity | 0.68           | -0.01   | -0.01    | 0.46           |
| NA        | 2006 | Invasion resistance       | 0.27           | 0.05    | -0.05    | 0.05           |
| NA        | 2006 | Plant nitrogen            | -0.07          | 0.02    | -0.03    | 0.01           |
| NA        | 2006 | Root biomass              | 0.69           | -0.02   | 0.00     | 0.49           |
| NA        | 2006 | Soil carbon               | 0.29           | -0.01   | 0.01     | 0.09           |

$\beta$  is measured as 1 - Sørensen's index.  $n = 6,489$  landscapes for each regression. NA indicates not applicable because regressions measure single functions.  $P < 0.05$  for all regressions.

\*Parameter should not be included in best model as selected by AIC.
